# Supplementary material for: Alterations of Oxidative Phosphorylation Complexes in Papillary Thyroid Carcinoma
Source: MDPI journal article supplement (doi:10.3390/cells7050040), 2018-05-09
Supplement: s1 [file s1]

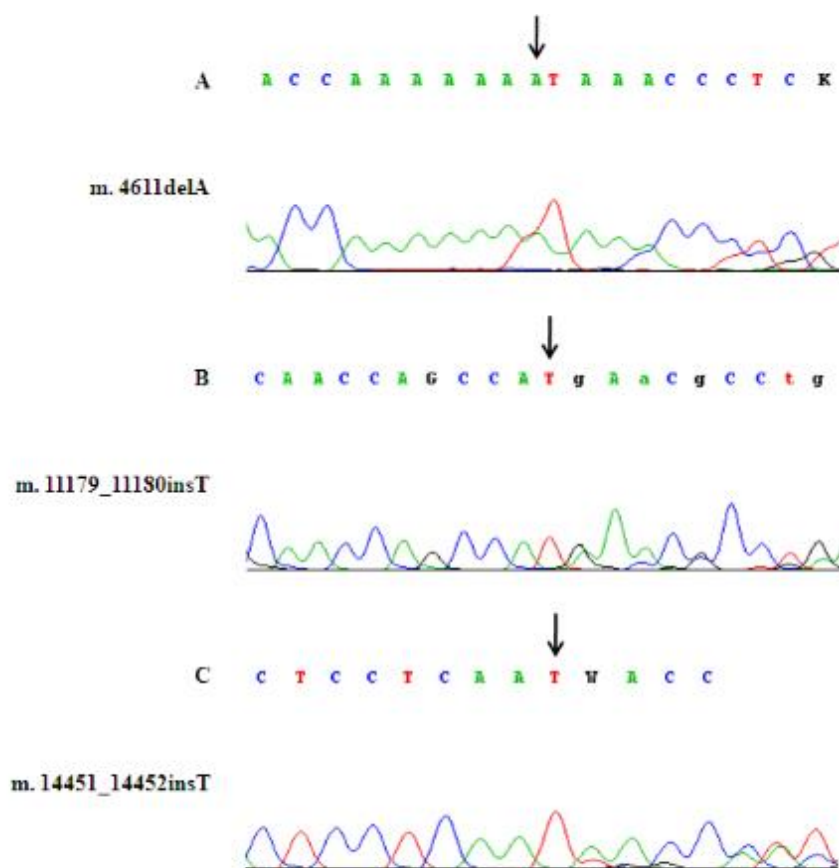

**SUPPLEMENTALFIGURE 1**

**Figure S1.** Sequencing analysis of the mtDNA of PTC 7 (A) (m.4611delA), PTC 8 (B) (m.11179\_11180insT) and PTC 1 (C) (m.14451\_14452insT).
